# Supplementary material for: Functional double dissociation within the entorhinal cortex for visual scene-dependent choice behavior
Source: eLife. 2017 Feb 7;6:e21543. doi: 10.7554/eLife.21543 (PMC5308889; doi:10.7554/eLife.21543)
Supplement: Figure 2—source data 1. — Source data for performance in the SSC task (Figure 2B). DOI: http://dx.doi.org/10.7554/eLife.21543.004 [file elife-21543-fig2-data1.xlsx]

## Sheet: Sheet1
	SSC task (n=8)
	No.	Rat	Performance (%)			Testing period
			aCSF	LEC MUS	MEC MUS
	1	272	95	88	83	2014.12.18-12.21
	2	275	93	80	48	2015.01.07-01.09
	3	278	93	83	53	2015.01.30-02.01
	4	280	93	90	85	2015.01.25-01.27
	5	299	98	98	55	2015.06.10-06.12
	6	305	98	88	70	2015.06.28-07.02
	7	308	93	90	63	2015.06.21-06.24
	8	321	80	88	75	2015.08.11-08.14
