# Supplementary material for: Functional double dissociation within the entorhinal cortex for visual scene-dependent choice behavior
Source: eLife. 2017 Feb 7;6:e21543. doi: 10.7554/eLife.21543 (PMC5308889; doi:10.7554/eLife.21543)
Supplement: Figure 2—source data 2. — Source data for performance in the tactile-based spatial choice task (Figure 2C). DOI: http://dx.doi.org/10.7554/eLife.21543.005 [file elife-21543-fig2-data2.xlsx]

## Sheet: Sheet1
	Tactile cue-based spatial choice task (n=10)
	No.	Rat	Performance (%)
			aCSF	LEC MUS	MEC MUS
	1	299	88	98	93
	2	305	88	95	98
	3	308	88	98	95
	4	321	90	95	88
	5	341	88	83	93
	6	361	95	90	93
	7	362	80	85	83
	8	403	98	95	98
	9	404	88	100	95
	10	417	85	80	75
