# Supplementary material for: Functional double dissociation within the entorhinal cortex for visual scene-dependent choice behavior
Source: eLife. 2017 Feb 7;6:e21543. doi: 10.7554/eLife.21543 (PMC5308889; doi:10.7554/eLife.21543)
Supplement: Figure 3—source data 1. — Source data for performance in the SNSC task (Figure 3B and C). DOI: http://dx.doi.org/10.7554/eLife.21543.008 [file elife-21543-fig3-data1.xlsx]

## Sheet: Sheet1
	SNSC task (n=9)
	No.	Rat	LEC cannula positions	Performance			Testing period
				aCSF	LEC MUS	MEC MUS
	1	341	deep	90	75	93	2015.11.14-11.16
	2	361	deep	95	68	80	2015.12.02-12.04
	3	362	superficial	98	90	88	2015.12.05-12.09
	4	403	deep	90	68	80	2016.04.27-04.29
	5	404	superficial	93	93	93	2016.05.05-05.07
	6	417	superficial	80	78	88	2016.05.02-05.05
	7	455	deep	98	53	80	2016.12.13-12.18
	8	457	deep	88	60	88	2016.12.18-12.23
	9	458	superficial	93	88	98	2016.12.18-12.23
