# Supplementary material for: Functional double dissociation within the entorhinal cortex for visual scene-dependent choice behavior
Source: eLife. 2017 Feb 7;6:e21543. doi: 10.7554/eLife.21543 (PMC5308889; doi:10.7554/eLife.21543)
Supplement: Figure 5—source data 1. — Source data for performance in the object memory task (Figure 5B). DOI: http://dx.doi.org/10.7554/eLife.21543.012 [file elife-21543-fig5-data1.xlsx]

## Sheet: Sheet1
	object memory task (n=9)
	No.	Rat	Performance (%)			Test date
			aCSF	LEC MUS	MEC MUS
	1	275	98	93	98	2015.03.08-03.13
	2	278	88	83	95	2015.03.12-03.17
	3	280	95	98	95	2015.03.03-03.09
	4	299	93	100	100	2015.08.02-08.07
	5	305	98	93	100	2015.09.03-09.09
	6	308	98	95	98	2015.08.19-08.24
	7	403	85	80	83	2016.05.18-05.20
	8	404	98	95	100	2016.05.26-05.28
	9	417	83	93	83	2016.05.29-05.31
